# Supplementary material for: High dose and compartmental target volume may improve patient outcome after radiotherapy for pelvic bone metastases from hepatocellular carcinoma
Source: PubMed Central journal article supplement (PMC5288232; doi:10.18632/oncotarget.9767), 2016-06-01
Supplement: oncotarget-07-53921-s001.pdf [file oncotarget-07-53921-s001.pdf]

## High dose and compartmental target volume may improve patient outcome after radiotherapy for pelvic bone metastases from hepatocellular carcinoma

### SUPPLEMENTARY FIGURE AND TABLES

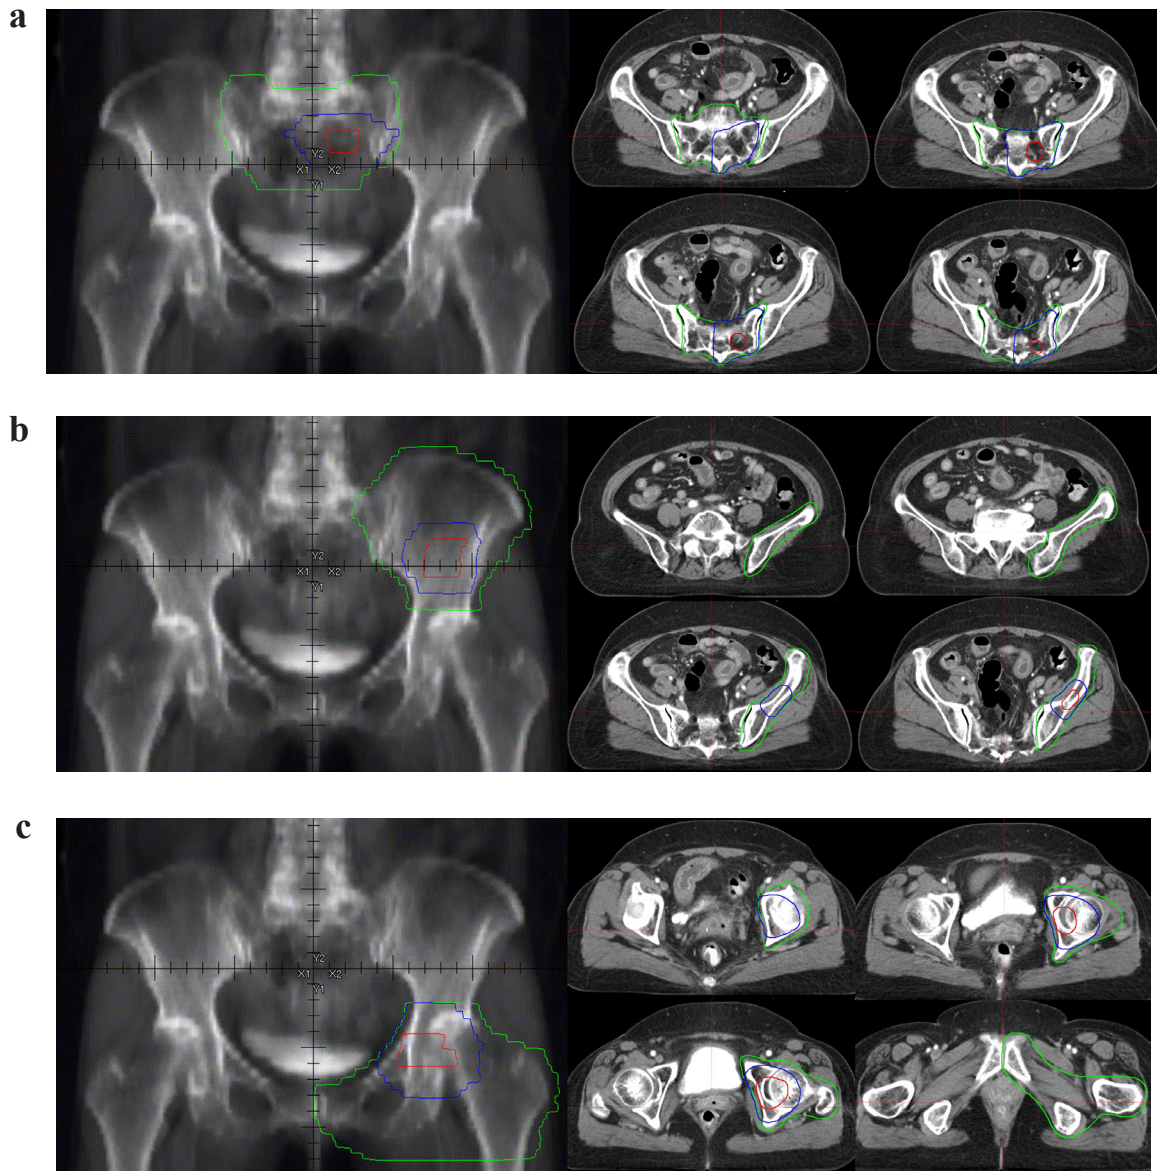

**Supplementary Figure S1: Compartmental target volume and marginal target volume.** Sacrum **a.** ilium **b.** and lower pelvic bone **c.** Gross tumor volume (red line), compartment target volume (green line), and marginal target volume (blue line).

Supplementary Table S1: Patient characteristics

| Variable                  | Group        | n  | %     |
|---------------------------|--------------|----|-------|
| Age (years)               | Median       |    | 56    |
|                           | Range        |    | 36-79 |
| Sex                       | Male         | 70 | 79%   |
|                           | Female       | 19 | 21%   |
| Virus                     | HBV          | 77 | 86%   |
|                           | HCV          | 7  | 8%    |
|                           | NBNC         | 5  | 6%    |
| Child-Pugh classification | A            | 71 | 80%   |
|                           | B            | 11 | 12%   |
|                           | C            | 7  | 8%    |
| Primary tumor control     | Controlled   | 65 | 72%   |
|                           | Uncontrolled | 24 | 28%   |

Abbreviations: HBV, Hepatitis B Virus; HCV, Hepatitis C Virus; NBNC, Non-B Non-C.

Supplementary Table S2: Pain control rate according to target volume

| Variable                      | Group                  | Pain control rate (%) |          | <i>p</i> value |
|-------------------------------|------------------------|-----------------------|----------|----------------|
|                               |                        | Compartmental         | Marginal |                |
| Pelvic subsite                | Sacrum (44)            | 59%                   | 80%      | 0.283          |
|                               | Ilium (43)             | 82%                   | 64%      | 0.171          |
|                               | Acetabulum (26)        | 86%                   | 67%      | 0.198          |
|                               | Pubic bone (17)        | 87%                   | 57%      | 0.16           |
|                               | Ischium (16)           | 78%                   | 25%      | 0.077          |
| Site categorization           | Upper pelvic bone (87) | 68%                   | 68%      | 0.954          |
|                               | Lower pelvic bone (43) | 79%                   | 57%      | 0.077          |
| Primary control               | Controlled (36)        | 57%                   | 62%      | 0.769          |
|                               | Uncontrolled (110)     | 77%                   | 65%      | 0.138          |
| No. of pelvic bone metastasis | Single (59)            | 72%                   | 70%      | 0.826          |
|                               | Multiple (87)          | 71%                   | 61%      | 0.285          |
| Other bone involvement        | Present (110)          | 70%                   | 64%      | 0.507          |
|                               | Absent (36)            | 79%                   | 65%      | 0.463          |
| Soft tissue extension         | Present (41)           | 84%                   | 63%      | 0.15           |
|                               | Absent (105)           | 67%                   | 64%      | 0.812          |
| Metastasis characteristic     | Mixed (136)            | 73%                   | 70%      | 0.722          |
|                               | Pure osteolytic (10)   | 33%                   | 14%      | 1              |
